# Supplementary material for: Porphyromonas gingivalis Placental Atopobiosis and Inflammatory Responses in Women With Adverse Pregnancy Outcomes
Source: PubMed Central journal article supplement (PMC7738622; doi:10.3389/fmicb.2020.591626), 2020-12-02
Supplement: Table_1.pdf [file Table_1.pdf]

**Supplementary Table 1. Periodontal status and distribution of microorganisms in subgingival dental plaque according to the study groups.**

|                                              | Control<br>n=17               | <i>Pg</i> + APO+<br>n=5 | <i>Pg</i> + APO-<br>n=4            | UGM + APO +<br>n=5             | PI - APO +<br>n=9             |
|----------------------------------------------|-------------------------------|-------------------------|------------------------------------|--------------------------------|-------------------------------|
| <b>Plaque index</b>                          | 0.35 (0.19-0.5)               | 0.56 (0.49-0.89)        | 0.85 (0.73.-0.92)                  | 0.42 (0.25-0.58)               | 0.30 (0.23-0.37)              |
| <b>Gingival index</b>                        | 0.27 (0.12-0.38) <sup>c</sup> | 0.49 (0.44-0.56)        | 0.85 (0.73.-0.92) <sup>a,d,e</sup> | 0.27 (0.25-0.38) <sup>c</sup>  | 0.24 (0.11-0.36) <sup>c</sup> |
| <b>Bleed on probing</b>                      | 0.26 (0.12-0.38)              | 0.37 (0.30-0.56)        | 0.87 (0.73.-0.94) <sup>a,d,e</sup> | 0.18 (0.16.-0.56) <sup>c</sup> | 0.24 (0.11-0.37) <sup>c</sup> |
| <b>Clinical attachment level</b>             | 0.12 (0.05-0.33)              | 0.25 (0.09-0.40)        | 0.61 (0.41.-1.04)                  | 0.07 (0.06.-1.02)              | 0.18 (0.03-0.41)              |
| <b>Pocket depth</b>                          | 2.37 (2.28.-2.56)             | 2.28 (2.21-2.48)        | 2.64 (2.55.-2.70)                  | 2.38 (2.25.-3.13)              | 2.31 (2.27-2.31)              |
| <b><i>P. gingivalis</i> n (%)</b>            |                               |                         |                                    |                                |                               |
| Presence **                                  | 0 (0,0%)                      | 3 (60,0%)               | 3 (75,0%)                          | 2 (40,0%)                      | 0 (0,0%)                      |
| <b><i>T. forsythia</i> n (%)</b>             |                               |                         |                                    |                                |                               |
| Presence**                                   | 0 (0,0%)                      | 0 (0,0%)                | 0 (0,0%)                           | 2 (40,0%)                      | 0 (0,0%)                      |
| <b><i>T. denticola</i> n (%)</b>             |                               |                         |                                    |                                |                               |
| Presence**                                   | 0 (0,0%)                      | 1 (20,0%)               | 2 (50,0%)                          | 3 (60,0%)                      | 0 (0,0%)                      |
| <b><i>E. nodatum</i> n (%)</b>               |                               |                         |                                    |                                |                               |
| Presence**                                   | 0 (0,0%)                      | 1 (20,0%)               | 2 (50,0%)                          | 1 (20,0%)                      | 0 (0,0%)                      |
| <b><i>A. actinomycetemcomitans</i> n (%)</b> |                               |                         |                                    |                                |                               |
| Absence                                      | 17 (100,0%)                   | 5 (100,0%)              | 4 (100,0%)                         | 5 (100,0%)                     | 9 (100,0%)                    |
| <b><i>F. nucleatum</i> n (%)</b>             |                               |                         |                                    |                                |                               |
| Absence                                      | 17 (100,0%)                   | 5 (100,0%)              | 4 (100,0%)                         | 5 (100,0%)                     | 9 (100,0%)                    |

Periodontal indices are expressed in median and interquartile ranks. \*\* $p \leq 0.05$  by  $Chi^2$  test; a) Significant differences Vs control b) Vs *Pg* +APO+, c) Vs *Pg* + APO-, d) Vs UGM + APO+, e) PI – APO +, by Kruskal–Wallis and /or U de Mann-Whitney tests.

*Pg* + APO+ = *P. gingivalis* (+) adverse pregnancy outcome (+); *Pg* + APO– = *P. gingivalis* (+) adverse pregnancy outcome –; UGM +APO+= urogenital microorganisms(+),adverse pregnancy outcome +; PI – APO+ = Placental infection (–) adverse pregnancy outcome (+). Control = adverse pregnancy outcome (–) without Intra-amniotic infection.
