# Supplementary material for: Porphyromonas gingivalis Placental Atopobiosis and Inflammatory Responses in Women With Adverse Pregnancy Outcomes
Source: PubMed Central journal article supplement (PMC7738622; doi:10.3389/fmicb.2020.591626), 2020-12-02
Supplement: Table_2.pdf [file Table_2.pdf]

**Supplementary Table 2. Distribution of adverse outcomes and clinical signs of placental infection in pregnant women according to the study groups.**

|                      | Control      | <i>Pg</i> +APO+ | <i>Pg</i> + APO- | UGM+APO+    | PI – APO+   |
|----------------------|--------------|-----------------|------------------|-------------|-------------|
|                      | <i>n</i> =17 | <i>n</i> =5     | <i>n</i> =4      | <i>n</i> =5 | <i>n</i> =9 |
| <b>PPROM (F %)</b>   |              |                 |                  |             |             |
| No                   | 17 (100)     | 4 (80)          | 4 (100)          | 3 (60)      | 6 (66.)     |
| Yes                  | 0 (0)        | 1 (20)          | 0 (0)            | 2 (40)      | 3 (33.3)**  |
| <b>LBW (F %)</b>     |              |                 |                  |             |             |
| No                   | 17 (100)     | 3 (60)          | 4 (100)          | 1 (20)      | 6 (66.7)    |
| Yes                  | 0 (0)        | 2 (40)          | 0 (0)            | 4 (80)**    | 3 (33.3)    |
| <b>PTB (F %)</b>     |              |                 |                  |             |             |
| No                   | 17 (100)     | 3 (60)          | 4 (100)          | 1 (20)      | 6 (66.7)    |
| Yes                  | 0 (0)        | 2 (40)          | 0 (0)            | 4 (80)**    | 3 (33.3)    |
| <b>LBW-PPB (F %)</b> |              |                 |                  |             |             |
| No                   | 17 (100)     | 4 (80)          | 4 (100)          | 2 (40)      | 7 (77.8)    |
| Yes                  | 0 (0)        | 1 (20)          | 0 (0)            | 3 (60)**    | 2 (22.2)    |

\*\**p* < 0.05 statistically significant difference. Clinical signs of infection included uterine hypersensitivity, fever, maternal tachycardia, fetal tachycardia and fetid flow.

*Pg* + APO+ = *P. gingivalis* (+) adverse pregnancy outcome (+); *Pg* + APO– = *P. gingivalis* (+) adverse pregnancy outcome –; UGM +APO+= urogenital microorganisms(+)adverse pregnancy outcome +; PI – APO+ = Placental infection (–) adverse pregnancy outcome (+). Control = adverse pregnancy outcome (–) without Intra-amniotic infection.
